# Supplementary material for: Navigation of Silver/Carbon Nanoantennas in Organic Fluids Explored by a Two-Wave Mixing
Source: MDPI journal article supplement (doi:10.3390/nano10091886), 2020-09-21
Supplement: s1 [file s1]

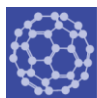

Article

# Navigation of Silver/Carbon Nanoantennas in Organic Fluids Explored by a Two-Wave Mixing

## Supplementary material

The electric fields in propagation through the samples can be described by considering the wave equation [29]:

$$\nabla^2 E_{\pm} = -\frac{n_{\pm}^2 \omega^2}{c^2} E_{\pm} \quad (\text{S1})$$

In this mathematical equation  $E_+$  and  $E_-$  represent the circular components of the left and right electric fields in the TWM interaction. The optical frequency is described by  $\omega$ ,  $c$  corresponds to the speed of the light and  $n$  is the refractive index dependent on irradiance which can be also described by [29]:

$$n_{\pm}^2 = n_0^2 + 4\pi \left( \chi_{1122}^{(3)} |E_{\pm}|^2 + (\chi_{1122}^{(3)} + \chi_{1212}^{(3)}) |E_{\mp}|^2 \right) \quad (\text{S2})$$

where  $n_0$  is the weak-field refractive index.  $\chi_{1122}^{(3)}$  and  $\chi_{1212}^{(3)}$  are the independent components of the third-order susceptibility tensor  $\chi^{(3)}$ .

In the interaction of a beam of light with nonlinear optical media can be involved an intensity-dependent refractive index  $n$ :

$$n = n_0 + n_2 I \quad (\text{S3})$$

where,  $n_0$  is the weak-field refractive index,  $n_2$  in the nonlinear refractive index, and  $I$  refers to the intensity of the optical field.

The Lorentz–Lorenz equation relates the refractive index of a material to its polarizability  $\alpha$ , and it can be written in terms of mass density  $\rho_m$  [29]:

$$\frac{n^2 - 1}{n^2 + 2} = \frac{4\pi}{3} \frac{N_A \rho_m}{M} \alpha \quad (\text{S4})$$

where  $N_A$  is the Avogadro's number and  $M$  is the molecular weight of the chemical element.
